# Supplementary material
Source: publisher figshare collection journal article supplement (https://acs.figshare.com/ndownloader/files/4129342)
Supplement: Supplementary file 1 [file 4129342]

# **Peptide Bond Hydrolysis Catalyzed by the Wells-Dawson $\text{Zr}(\alpha_2\text{-P}_2\text{W}_{17}\text{O}_{61})_2$ Polyoxometalate**

Gregory Absillis and Tatjana N. Parac-Vogt\*

Department of Chemistry, KU Leuven, Celestijnenlaan 200F, B-3001 Leuven, Belgium

**Supporting Information**

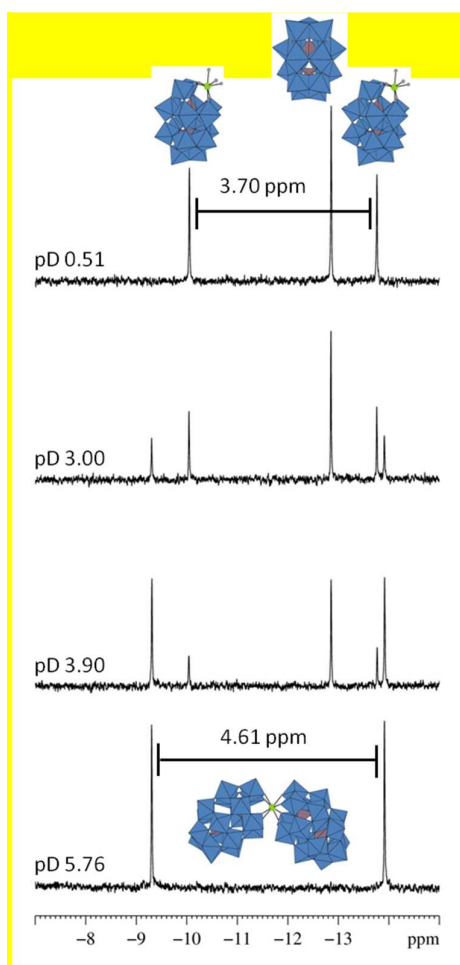

Figure S1. pD dependence of the  $^{31}\text{P}$  NMR spectrum of 2.0 mM of **1**. The spectra were recorded immediately after mixing and pD adjustment. (242.94 MHz,  $\text{D}_2\text{O}$ , 293 K,  $n$  128,  $d_1$  60 s, 25%  $\text{H}_3\text{PO}_4$ ). The peaks at -9.34 ppm and -13.95 ppm ( $\Delta = 4.61$  ppm) are characteristic for the 1:2 species.<sup>1</sup> The 1:1 monomer can be found at -10.04 ppm and -13.76 ppm ( $\Delta = 3.70$  ppm).<sup>2</sup>

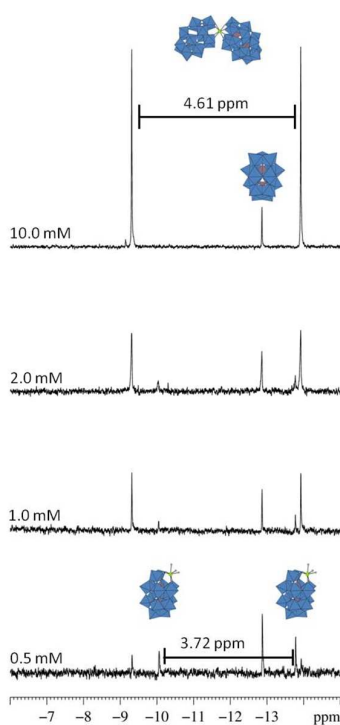

Figure S2. Concentration dependence of the  $^{31}\text{P}$  NMR spectrum of **1** at pH 5.0. The spectra were recorded immediately after mixing. (242.94 MHz,  $\text{D}_2\text{O}$ , 293 K,  $n = 128$ ,  $d1 = 60$  s, 25%  $\text{H}_3\text{PO}_4$ ) The peaks at -9.34 ppm and -13.95 ppm ( $\Delta = 4.61$  ppm) are characteristic for the 1:2 species.<sup>1</sup> The 1:1 monomer can be found at -10.04 ppm and -13.76 ppm ( $\Delta = 3.70$  ppm).<sup>2</sup>

Table S1: Concentration dependence of the species distribution of **1** at pD 5.0.

| Concentration (mM) | % 1:2 | % 1:1 |
|--------------------|-------|-------|
| 10.0               | 100   | 0     |
| 2.0                | 80.92 | 19.08 |
| 1.0                | 73.18 | 26.82 |
| 0.5                | 16.88 | 83.12 |

Table S2. Time dependence of the species distribution of 2.0 mM and 10.0 mM of **1** at pD 5.0 and 60 °C.

| Time   | 2.0 mM <b>1</b>  |       | 10.0 mM <b>1</b> |       |
|--------|------------------|-------|------------------|-------|
|        | 2:2 <sup>a</sup> | 1:2   | 2:2              | 1:2   |
| 1 day  | 39.54            | 60.46 | 16.77            | 83.23 |
| 2 days | 48.26            | 51.74 | 21.65            | 78.35 |
| 1 week | 46.79            | 53.21 | 22.52            | 77.48 |

a) The 2:2 dimer can be found at -9.87 and -12.82 ppm.<sup>3</sup>

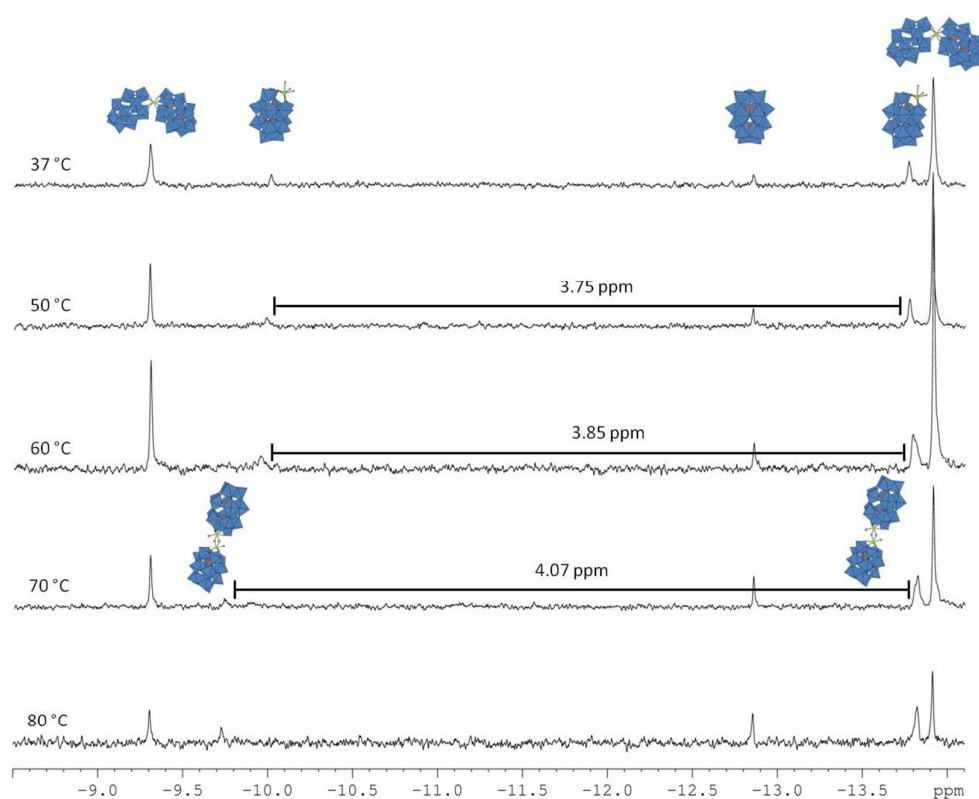

Figure S3: Temperature dependence of the  $^{31}\text{P}$  NMR spectrum of 2.0 mM of **1** after 1 h at X °C and pD 5.0. (242.94 MHz,  $\text{D}_2\text{O}$ , 293 K,  $n = 512$ ,  $d1 = 2$  s, 25%  $\text{H}_3\text{PO}_4$ )

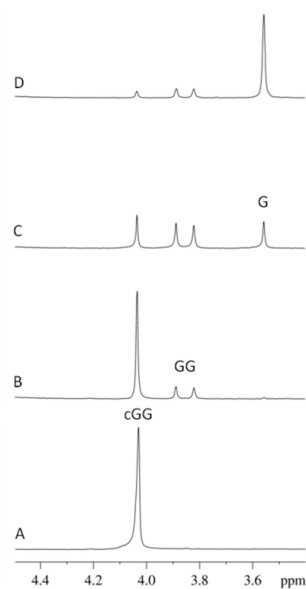

Figure S4.  $^1\text{H}$  NMR spectra recorded at various reaction times during the hydrolysis of 2.0 mM of cGG in the presence of 2.0 mM of **1** at pD 5.0 and 60 °C. (400 MHz,  $\text{D}_2\text{O}$ , 293 K,  $n = 16$ , 0.5 mM TMSPA- $\text{d}_4$ ) (A) after mixing (B) after 1910 min (C) 10160 min (D) after 30455 min.

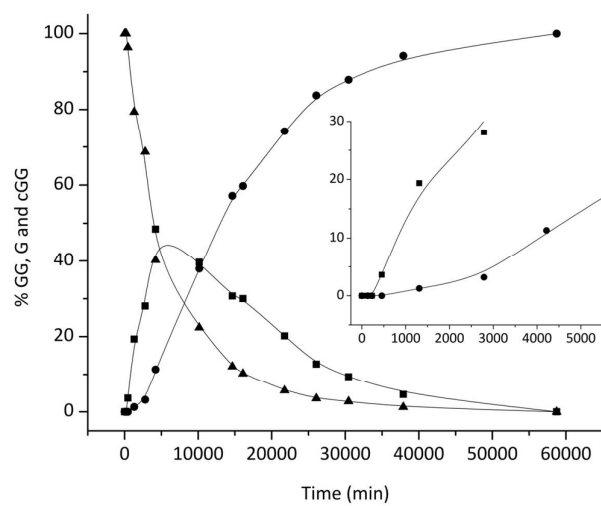

Figure S5. Hydrolysis of 2.0 mM of cGG in the presence of 2.0 mM of **1** at pH 5.0 and 60 °C. Percentage of GG (■-), G (●-), and cGG (▲-) as a function of reaction time.



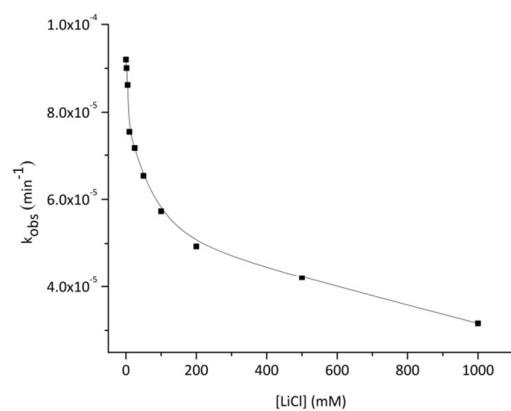

Figure S6. Effect of salt concentration on the rate constant for the hydrolysis of 2.0 mM of GG in the presence of 2.0 mM of **1** at pD 5.0 and 60 °C.

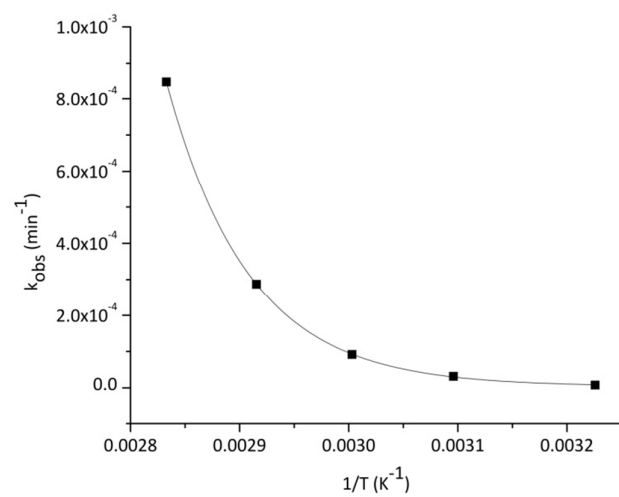

Figure S7. The reaction rate constant for the hydrolysis of GG as a function of the reciprocal temperature. (2.0 mM of GG - 2.0 mM of **1** at pD 5.0).

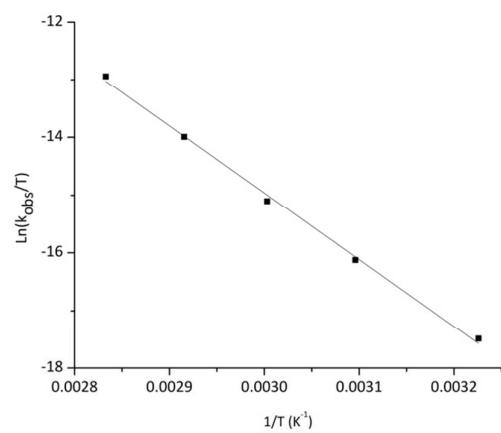

Figure S8.  $\ln(k_{\text{obs}}/T)$  as a function of the reciprocal temperature (2.0 mM GG - 2.0 mM **1** at pD 5.0).

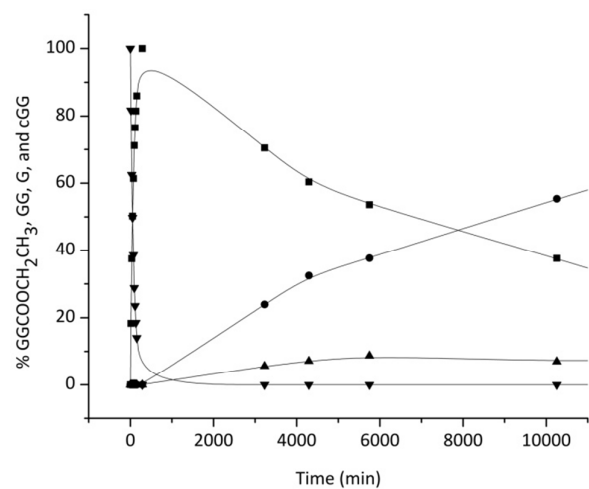

Figure S9. Hydrolysis of 2.0 mM of GGOEt in the presence of 2.0 mM of **1** at pD 5.0 and 60 °C. Percentage of GGOEt (-▼-), GG (-■-), G (-●-), and cGG (-▲-) as a function of reaction time.

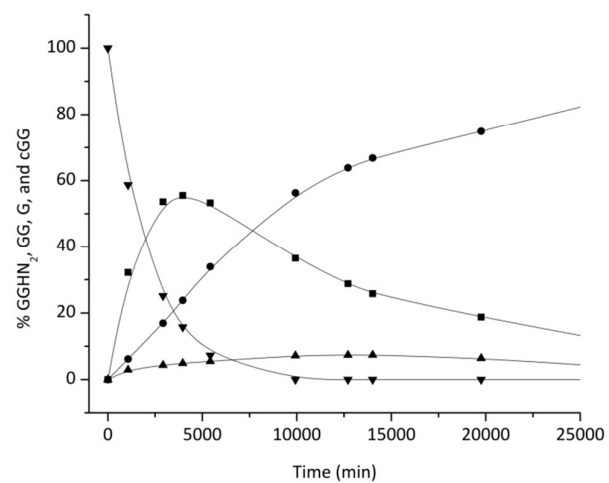

Figure S10. Hydrolysis of 2.0 mM of GGNH<sub>2</sub> in the presence of 2.0 mM of **1** at pH 5.0 and 60 °C. Percentage of GGNH<sub>2</sub> (▼), GG (■), G (●), and cGG (▲) as a function of reaction time.

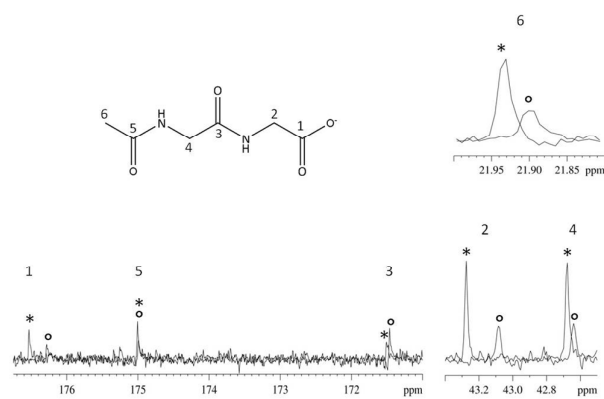

Figure S11.  $^{13}\text{C}$  NMR spectrum of AcGG in the presence (\*) and absence (°) of **1**.

Table S3.  $^{13}\text{C}$  NMR chemical shift values (ppm) of AcGG in the presence and absence of **1**.

|                      | 30.0 mM<br>AcGG | 10 mM AcGG +<br>10 mM <b>1</b> | $\Delta$<br>(ppm) |
|----------------------|-----------------|--------------------------------|-------------------|
| C1(CO)               | 176.28          | 176.53                         | 0.25              |
| C3(CO)               | 171.51          | 171.46                         | -0.05             |
| C5(CO)               | 174.99          | 175.01                         | 0.02              |
| C2(CH <sub>2</sub> ) | 43.08           | 43.28                          | 0.20              |
| C4(CH <sub>2</sub> ) | 42.64           | 42.67                          | 0.03              |
| C6(CH <sub>3</sub> ) | 21.90           | 21.93                          | 0.03              |

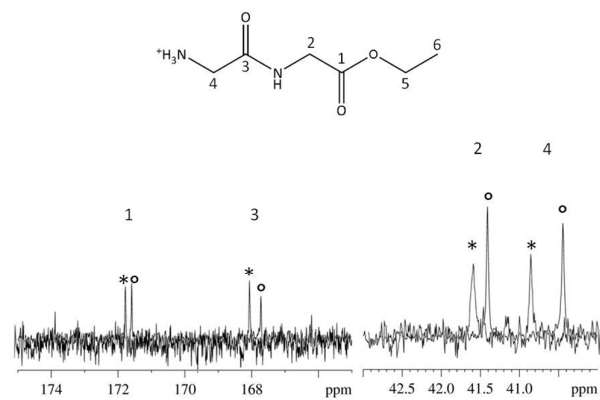

Figure S12.  $^{13}\text{C}$  NMR spectrum of GGOEt in the presence (\*) and absence (°) of **1**.



Table S4.  $^{13}\text{C}$  NMR chemical shift values (ppm) of GGOEt in the presence and absence of **1**.

|                      | 30 mM<br>GGOEt | 10 mM GGOEt +<br>10 mM <b>1</b> | $\Delta$<br>(ppm) |
|----------------------|----------------|---------------------------------|-------------------|
| C1(CO)               | 171.59         | 171.72                          | 0.13              |
| C3(CO)               | 167.72         | 168.03                          | 0.31              |
| C2(CH <sub>2</sub> ) | 41.41          | 41.70                           | 0.29              |
| C4(CH <sub>2</sub> ) | 40.44          | 40.98                           | 0.54              |
| C5(CH <sub>2</sub> ) | 62.75          | 62.75                           | 0.00              |
| C6(CH <sub>3</sub> ) | 13.33          | 13.40                           | 0.07              |

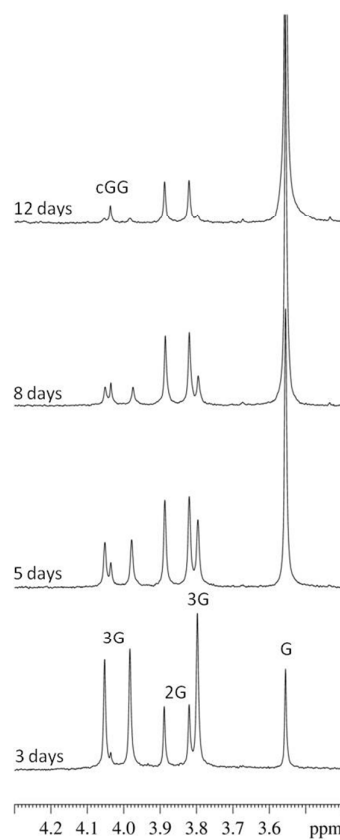

Figure S13.  $^1\text{H}$  NMR spectra recorded at various reaction times during the hydrolysis of 2.0 mM of 3G in the presence of 2.0 mM of **1** at 60 °C and pD 5.0. (600 MHz,  $\text{D}_2\text{O}$ , 293 K,  $n = 16$ , 0.5 mM TMSPA- $\text{d}_4$ )

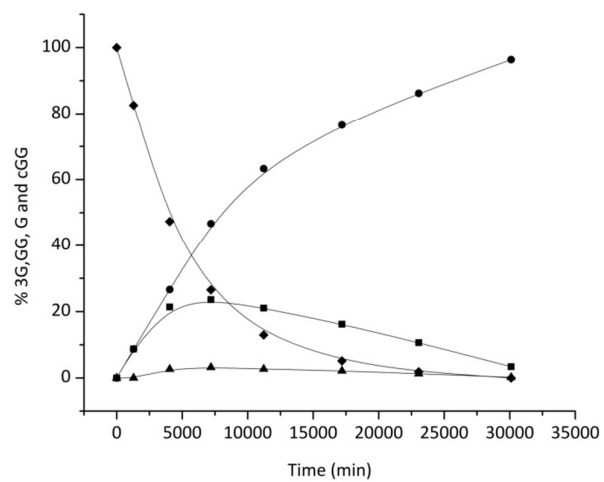

Figure S14. Hydrolysis of 2.0 mM of 3G in the presence of 2.0 mM of **1** at pH 5.0 and 60 °C. Percentage of 3G (-♦-), GG (-■-), G (-●-), and cGG (-▲-) as a function of reaction time.

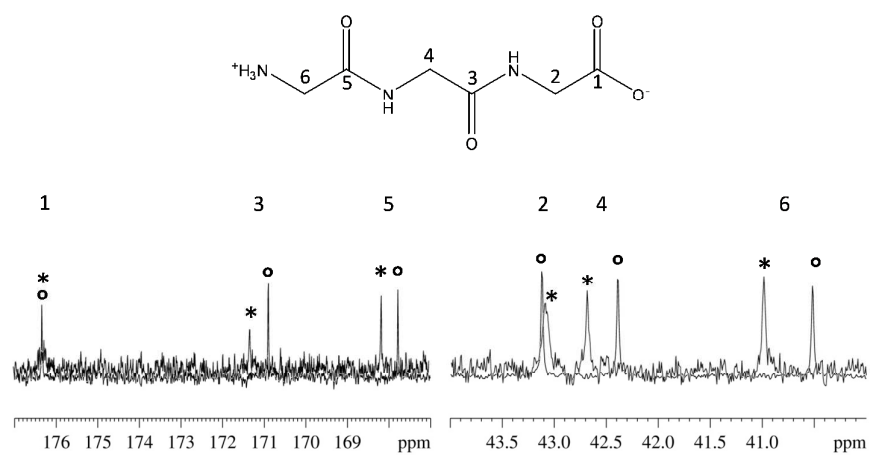

Figure S15.  $^{13}\text{C}$  NMR spectrum of 3G in the presence (\*) and absence (°) of **1**. (150.90 MHz,  $\text{D}_2\text{O}$ , 293 K,  $n = 20\text{k}$ , 1% TMS in  $\text{CDCl}_3$ )

Table S5.  $^{13}\text{C}$  NMR chemical shift values (ppm) of 3G in the presence and absence of **1**.

|                      | 30.0 mM 3G | 10.0 mM 3G + 10.0 mM <b>1</b> | $\Delta$ (ppm) |
|----------------------|------------|-------------------------------|----------------|
| C1(CO)               | 176.35     | 176.30                        | -0.05          |
| C3(CO)               | 170.90     | 171.31                        | 0.41           |
| C5(CO)               | 167.79     | 168.15                        | 0.36           |
| C2(CH <sub>2</sub> ) | 43.12      | 43.09                         | -0.03          |
| C4(CH <sub>2</sub> ) | 42.39      | 42.69                         | 0.30           |
| C6(CH <sub>2</sub> ) | 40.52      | 40.99                         | 0.47           |

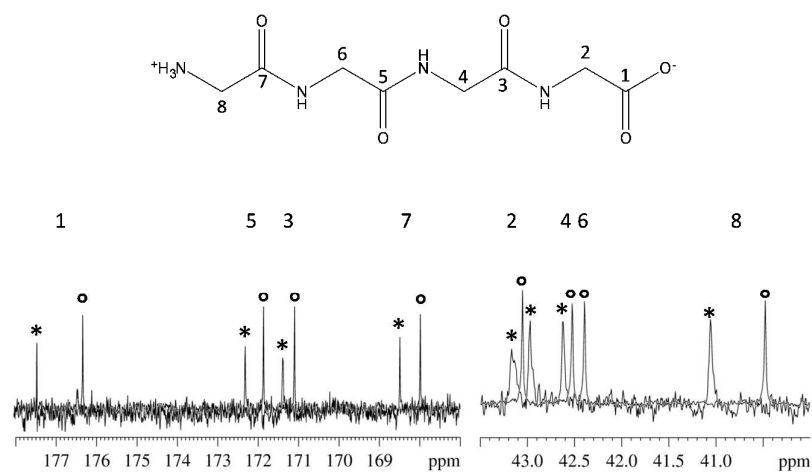

Figure S16.  $^{13}\text{C}$  NMR spectrum of 4G in the presence (\*) and absence (°) of 1. (150.90 MHz,  $\text{D}_2\text{O}$ , 293 K,  $n = 20\text{k}$ , 1% TMS in  $\text{CDCl}_3$ )

Table S6.  $^{13}\text{C}$  NMR chemical shift values (ppm) of 4G in the presence and absence of **1**.

|                      | 30.0 mM 4G | 10.0 mM 4G + 10.0 mM <b>1</b> | $\Delta$ (ppm) |
|----------------------|------------|-------------------------------|----------------|
| C1(CO)               | 176.34     | 177.42                        | 1.08           |
| C3(CO)               | 171.10     | 171.34                        | 0.24           |
| C5(CO)               | 171.87     | 172.27                        | 0.40           |
| C7(CO)               | 167.99     | 168.44                        | 0.45           |
| C2(CH <sub>2</sub> ) | 43.05      | 43.17                         | 0.11           |
| C4(CH <sub>2</sub> ) | 42.52      | 42.97                         | 0.45           |
| C6(CH <sub>2</sub> ) | 42.39      | 42.62                         | 0.23           |
| C8(CH <sub>2</sub> ) | 40.48      | 41.06                         | 0.58           |

- (1) Kato, C. N.; Shinohara, A.; Hayashi, K.; Nomiya, K. *Inorg. Chem.* **2006**, *45*, 8108.
- (2) Sokolov, M. N.; Izarova, N. V.; Peresypkina, E. V.; Mainichev, D. A.; Fedin, V. P. *Inorganica Chimica Acta* **2009**, *362*, 3756.
- (3) Saku, Y.; Sakai, Y.; Nomiya, K. *Inorganica Chimica Acta* **2010**, *363*, 967.
